# Supplementary material for: From local resynchronization to global pattern recovery in the zebrafish segmentation clock
Source: eLife. 2021 Feb 15;10:e61358. doi: 10.7554/eLife.61358 (PMC7984840; doi:10.7554/eLife.61358)
Supplement: Figure 1—source data 1. [file elife-61358-fig1-data1.xlsx]

## Sheet: tw=0ss
ISH Date	Sample	ID	0	1	2	3	4	5	6	7	8	9	10	11	12	13	14	15	16	17	18	19	20	21	22	23	24	25	26	27	28	29	30	31	32	33	34	30	=ALD fix		FRS	PLD
	*Fix: 825; AB inX, DAPT50 Wash-out @ 9.5hpf
2012-05-23	AB inX, DAPT wash-out @ 9.5hpf	1L	O	O	O	O	O	O	X	X	X	X	X	X	X	X	X	X	a	X	O	X	O	O	O	O	O	O	O	O	O	O	O	O	O	O	?		6		17	19
2012-05-23	AB inX, DAPT wash-out @ 9.5hpf	1R	O	O	O	O	O	O	X	X	X	X	X	X	X	O	X	X	a	X	X	O	X	O	O	O	O	O	O	O	O	O	O	O	O	O	?		6		12	20
2012-05-23	AB inX, DAPT wash-out @ 9.5hpf	2L	O	O	O	O	O	O	O	X	X	X	X	X	X	O	X	X	A	O	O	O	O	O	O	O	O	O	O	O	O	O	O	O	O	O	O	/	7		12	15
2012-05-23	AB inX, DAPT wash-out @ 9.5hpf	2R	O	O	O	O	O	O	X	X	X	X	X	X	X	X	X	X	A	O	O	O	O	O	O	O	O	O	O	O	O	O	O	O	O	O	O	/	6		15	15
2012-05-23	AB inX, DAPT wash-out @ 9.5hpf	3L	O	O	O	O	O	O	X	X	X	X	X	X	X	X	X	X	A	X	O	O	O	O	O	O	O	O	O	O	O	O	O	O	O	O	O	/	6		15	17
2012-05-23	AB inX, DAPT wash-out @ 9.5hpf	3R	O	O	O	O	O	X	X	X	X	X	X	X	X	X	O	O	A	O	O	X	O	O	O	O	O	O	O	O	O	O	O	O	O	O	O	/	5		13	19
2012-05-23	AB inX, DAPT wash-out @ 9.5hpf	4L	O	O	O	O	O	O	O	O	X	X	X	X	X	X	X	X	a	X	O	O	O	O	O	O	O	O	O	O	O	O	O	O	O	?			8		17	17
2012-05-23	AB inX, DAPT wash-out @ 9.5hpf	4R	O	O	O	O	O	O	O	O	O	X	X	O	X	X	X	X	A	O	O	O	O	O	O	O	O	O	O	O	O	O	O	O	O	O	?		9		10	15
2012-05-23	AB inX, DAPT wash-out @ 9.5hpf	5L	O	O	O	O	O	X	X	X	O	O	X	X	X	X	X	X	a	X	O	O	O	O	O	O	O	O	O	O	O	O	O	O	O	O	?		5		17	17
2012-05-23	AB inX, DAPT wash-out @ 9.5hpf	5R	O	O	O	O	O	X	X	O	X	X	X	X	X	X	O	O	a	X	O	O	O	O	O	O	O	O	O	O	O	O	O	O	O	O	?		5		13	17
2012-05-23	AB inX, DAPT wash-out @ 9.5hpf	6L	O	O	O	O	O	O	X	X	X	X	X	X	X	X	X	O	a	O	X	X	X	O	O	O	O	O	O	O	O	O	O	O	O	O	O	/	6		14	20
2012-05-23	AB inX, DAPT wash-out @ 9.5hpf	6R	O	O	O	O	O	O	X	X	X	X	X	X	X	X	O	O	A	O	O	O	O	O	O	O	O	O	O	O	O	O	O	O	O	O	O	/	6		13	13
2012-05-23	AB inX, DAPT wash-out @ 9.5hpf	7L	O	O	O	O	O	O	X	X	X	X	X	X	X	X	X	O	A	O	O	X	X	O	O	O	O	O	O	O	O	O	O	O	O	O	?		6		14	20
2012-05-23	AB inX, DAPT wash-out @ 9.5hpf	7R	O	O	O	O	X	O	O	O	O	X	X	X	X	X	O	X	a	O	O	O	O	O	O	O	O	O	O	O	O	O	O	O	O	O	/		4		13	16
2012-05-23	AB inX, DAPT wash-out @ 9.5hpf	8L	O	O	O	O	O	O	O	X	X	X	X	X	X	O	X	a	X	O	O	O	O	O	O	O	O	O	O	O	O	O	O	O	O	O	/		7		12	16
2012-05-23	AB inX, DAPT wash-out @ 9.5hpf	8R	O	O	O	O	O	O	O	X	X	X	X	X	X	X	O	X	a	O	O	O	O	O	O	O	O	O	O	O	O	O	O	O	O	O	/		7		13	16
2012-05-23	AB inX, DAPT wash-out @ 9.5hpf	9L	O	O	O	O	O	O	O	O	X	X	X	X	X	X	O	O	a	X	X	X	O	O	O	O	O	O	O	O	O	O	O	O	O	?			8		13	19
2012-05-23	AB inX, DAPT wash-out @ 9.5hpf	9R	O	O	O	O	O	O	X	X	X	X	X	X	X	X	X	O	A	O	O	O	O	O	O	O	O	O	O	O	O	O	O	O	O	?			6		14	14
2012-05-23	AB inX, DAPT wash-out @ 9.5hpf	10L	O	O	O	O	O	O	X	X	X	X	X	X	X	X	X	O	O	a	X	X	O	O	O	O	O	O	O	O	O	O	O	O	O	O	O	/	6		14	19
2012-05-23	AB inX, DAPT wash-out @ 9.5hpf	10R	O	O	O	O	O	O	O	O	X	X	X	X	X	X	X	X	O	a	O	O	O	O	O	O	O	O	O	O	O	O	O	O	O	O	O	/	8		15	17
2012-05-23	AB inX, DAPT wash-out @ 9.5hpf	11L	O	O	O	O	O	O	O	O	O	O	X	X	X	X	O	A	O	O	O	O	O	O	O	O	O	O	O	O	O	O	O	O	?				10		13	13
2012-05-23	AB inX, DAPT wash-out @ 9.5hpf	11R	O	O	O	O	O	O	X	X	X	X	X	X	X	X	O	A	O	O	O	O	O	O	O	O	O	O	O	O	O	O	O	O	O	?			6		13	13
2012-05-23	AB inX, DAPT wash-out @ 9.5hpf	12L	O	O	O	O	O	O	O	X	X	X	X	X	X	X	X	X	a	X	O	O	O	O	O	O	O	O	O	O	O	O	O	O	O	O	O	/	7		17	17
2012-05-23	AB inX, DAPT wash-out @ 9.5hpf	12R	O	O	O	O	O	X	X	X	X	X	X	X	O	O	O	a	O	O	O	O	O	O	O	O	O	O	O	O	O	O	O	O	O	/			5		11	15
2012-05-23	AB inX, DAPT wash-out @ 9.5hpf	13L	O	O	O	O	O	O	O	X	O	X	X	X	X	O	O	X	a	O	X	O	O	O	O	O	O	O	O	O	O	O	O	O	O	O	O	/	7		12	18
2012-05-23	AB inX, DAPT wash-out @ 9.5hpf	13R	O	O	O	O	O	O	X	X	X	X	X	X	X	X	O	X	a	X	X	X	O	O	O	O	O	O	O	O	O	O	O	O	O	O	O	/	6		13	19
2012-05-23	AB inX, DAPT wash-out @ 9.5hpf	14L	O	O	O	O	O	O	O	X	O	X	X	O	O	O	O	a	O	O	O	O	O	O	O	O	O	O	O	O	O	O	O	O	O	O	/		7		10	15
2012-05-23	AB inX, DAPT wash-out @ 9.5hpf	28	O	O	O	O	O	O	O	X	X	X	X	X	X	X	X	X	A	O	O	O	O	O	O	O	O	O	O	O	O	O	O	O	O	O	O	/	7		15	15
			0	1	2	3	4	5	6	7	8	9	10	11	12	13	14	15	16	17	18	19	20	21	22	23	24	25	26	27	28	29	30	31	32	33	34
			100	100	100	100	96.4286	85.7143	46.4286	25	21.4286	7.14286	0	7.14286	7.14286	21.4286	42.8571	35.7143	53.5714	60.7143	78.5714	75	89.2857	100	100	100	100	100	100	100	100	100	100	100	96.4286	81.4815	54.5455		6	Median ALD	13	17	Median PLD
			0	0	0	0	100	300	1100	600	100	400	200	-200	0	-400	-600	200	-500	-200	-500	100	-400	-300	0	0	0	0	0	0	0	0	0	0	100	418.519	754.209		6.5	Mean ALD	13.5714	16.6429	Mean PLD
		L	100	100	100	100	100	92.8571	57.1429	21.4286	28.5714	14.2857	0	7.14286	7.14286	28.5714	28.5714	35.7143	42.8571	50	71.4286	64.2857	85.7143	100	100	100	100	100	100	100	100	100	100				67.8571		1.29099	STD	1.93273	2.18097	STD
		R	100	100	100	100	92.8571	78.5714	35.7143	28.5714	14.2857	0	0	7.14286	7.14286	14.2857	57.1429	35.7143	64.2857	71.4286	85.7143	85.7143	92.8571	100	100	100	100	100	100	100	100	100	100				69.0476					3.07143	PLD-FRS

## Sheet: tw=3ss
ISH Date	Sample	ID	0	1	2	3	4	5	6	7	8	9	10	11	12	13	14	15	16	17	18	19	20	21	22	23	24	25	26	27	28	29	30	31	32	33	34	30	=ALD fix		FRS	PLD
	*Fix: 827; AB inX, DAPT50 Wash-out @ 11hpf
2012-05-23	AB inX, DAPT wash-out @ 11hpf	1L	O	O	O	O	O	O	O	X	X	X	X	X	X	O	X	A	O	O	O	O	O	O	O	O	O	O	O	O	O	O	O	O	O	/			7		12	14
2012-05-23	AB inX, DAPT wash-out @ 11hpf	1R	O	O	O	O	O	O	O	O	O	X	X	X	X	X	O	A	O	O	O	O	O	O	O	O	O	O	O	O	O	O	O	O	O	/			9		13	13
2012-05-23	AB inX, DAPT wash-out @ 11hpf	2L	O	O	O	O	O	O	O	O	X	X	X	X	X	O	X	X	a	O	X	O	O	O	O	O	O	O	O	O	O	O	O	O	O	O	/		8		12	18
2012-05-23	AB inX, DAPT wash-out @ 11hpf	2R	O	O	O	O	O	O	X	X	X	X	X	X	X	X	X	X	A	O	O	O	O	O	O	O	O	O	O	O	O	O	O	O	O	O	/		6		15	15
2012-05-23	AB inX, DAPT wash-out @ 11hpf	3L	O	O	O	O	O	O	O	X	X	X	X	X	X	X	X	O	A	O	O	O	O	O	O	O	O	O	O	O	O	O	O	O	O	O	/		7		14	14
2012-05-23	AB inX, DAPT wash-out @ 11hpf	3R	O	O	O	O	O	O	O	O	O	O	O	X	X	X	X	X	A	O	O	O	O	O	O	O	O	O	O	O	O	O	O	O	O	O	/		11		15	15
2012-05-23	AB inX, DAPT wash-out @ 11hpf	4L	O	O	O	O	O	O	O	O	O	X	X	X	X	X	O	X	O	A	O	X	O	O	O	O	O	O	O	O	O	O	O	O	O	O	/		9		13	19
2012-05-23	AB inX, DAPT wash-out @ 11hpf	4R	O	O	O	O	O	X	X	X	X	X	X	X	X	X	X	X	A	O	X	O	O	O	O	O	O	O	O	O	O	O	O	O	O	/			5		15	18
2012-05-23	AB inX, DAPT wash-out @ 11hpf	5L	O	O	O	O	O	O	O	O	O	X	X	X	X	X	X	O	a	O	O	O	O	O	O	O	O	O	O	O	O	O	O	O	O	O	/		9		14	16
2012-05-23	AB inX, DAPT wash-out @ 11hpf	5R	O	O	O	O	O	O	O	X	X	X	X	X	X	X	X	X	A	O	O	O	O	O	O	O	O	O	O	O	O	O	O	O	O	O	O	/	7		15	15
2012-05-23	AB inX, DAPT wash-out @ 11hpf	6L	O	O	X	O	O	O	X	X	X	X	O	X	X	X	X	X	a	O	O	O	O	O	O	O	O	O	O	O	O	O	O	O	O	O	?		2		9	16
2012-05-23	AB inX, DAPT wash-out @ 11hpf	6R	O	O	X	X	O	O	X	X	X	X	X	X	X	X	X	A	O	O	O	O	O	O	O	O	O	O	O	O	O	O	O	O	O	?			2		14	14
2012-05-23	AB inX, DAPT wash-out @ 11hpf	7L	O	O	O	O	O	X	X	X	X	X	X	X	X	X	X	X	A	O	O	X	X	O	O	O	O	O	O	O	O	O	O	O	O	O	O	/	5		15	20
2012-05-23	AB inX, DAPT wash-out @ 11hpf	7R	O	O	O	O	O	O	O	X	X	X	X	X	X	X	X	O	a	X	X	O	O	O	O	O	O	O	O	O	O	O	O	O	O	O	O	/	7		14	18
2012-05-23	AB inX, DAPT wash-out @ 11hpf	8L	O	O	O	X	O	O	O	O	X	X	X	X	X	X	O	O	A	O	O	O	O	X	O	O	O	O	O	O	O	O	O	O	O	O	?		3		13	21
2012-05-23	AB inX, DAPT wash-out @ 11hpf	8R	O	O	O	O	O	O	O	X	X	X	X	X	X	X	X	O	A	O	X	O	O	X	O	O	O	O	O	O	O	O	O	O	O	O	/		7		14	21
2012-05-23	AB inX, DAPT wash-out @ 11hpf	9L	O	O	O	O	O	O	O	O	O	X	X	X	X	X	X	A	X	X	X	O	O	O	O	O	O	O	O	O	O	O	O	O	O	O	/		9		14	18
2012-05-23	AB inX, DAPT wash-out @ 11hpf	9R	O	O	O	O	O	O	O	X	X	X	X	X	X	X	X	A	O	O	X	X	O	X	O	O	O	O	O	O	O	O	O	O	O	O	/		7		14	21
2012-05-23	AB inX, DAPT wash-out @ 11hpf	10L	O	O	O	O	O	X	X	X	X	X	X	X	X	X	O	X	a	X	X	O	O	O	O	O	O	O	O	O	O	O	O	O	O	O	/		5		13	18
2012-05-23	AB inX, DAPT wash-out @ 11hpf	10R	O	O	O	O	O	O	O	O	X	X	X	O	O	X	X	O	A	O	O	O	O	O	O	O	O	O	O	O	O	O	O	O	O	O	/		8		10	14
2012-05-23	AB inX, DAPT wash-out @ 11hpf	11L	O	O	O	O	O	O	O	O	X	X	X	X	X	X	X	O	A	O	X	X	O	O	O	O	O	O	O	O	O	O	O	O	O	O	?		8		14	19
2012-05-23	AB inX, DAPT wash-out @ 11hpf	22	O	O	O	O	O	O	O	X	X	X	X	X	X	X	X	O	a	O	X	O	O	O	O	O	O	O	O	O	O	O	O	O	O	O	O	/	7		14	18
			0	1	2	3	4	5	6	7	8	9	10	11	12	13	14	15	16	17	18	19	20	21	22	23	24	25	26	27	28	29	30	31	32	33	34
			100	100	90.9091	90.9091	100	86.3636	72.7273	40.9091	22.7273	4.54545	9.09091	4.54545	4.54545	9.09091	18.1818	59.0909	68.1818	86.3636	59.0909	81.8182	95.4545	86.3636	100	100	100	100	100	100	100	100	100	100	100	81.8182	22.2222		7	Median ALD	14	18	Median
			0	0	9.09091	0	-9.09091	13.6364	13.6364	31.8182	18.1818	18.1818	-4.54545	4.54545	0	-4.54545	-9.09091	-40.9091	-9.09091	-18.1818	27.2727	-22.7273	-13.6364	9.09091	-13.6364	0	0	0	0	0	0	0	0	0	0	18.1818	59.596		6.72727	Mean ALD	13.4545	17.0455	Mean
		L	100	100	90.9091	90.9091	100	81.8182	72.7273	54.5455	27.2727	0	9.09091	0	0	18.1818	27.2727	54.5455	54.5455	81.8182	63.6364	72.7273	90.9091	90.9091	100	100	100	100	100	100	100	100	100				69.3939		2.31315	STD	1.56532	2.55375	STD
		R	100	100	90.9091	90.9091	100	90.9091	72.7273	27.2727	18.1818	9.09091	9.09091	9.09091	9.09091	0	9.09091	63.6364	81.8182	90.9091	54.5455	90.9091	100	81.8182	100	100	100	100	100	100	100	100	100				70					3.59091	PLD-FRS

## Sheet: tw=6ss
ISH Date	Sample	ID	0	1	2	3	4	5	6	7	8	9	10	11	12	13	14	15	16	17	18	19	20	21	22	23	24	25	26	27	28	29	30	31	32	33	34	30	=ALD fix		FRS	PLD
	*Fix: 829; AB inX, DAPT50 Wash-out @ 12.5hpf
2012-05-23	AB inX, DAPT wash-out @ 12.5hpf	1L	O	O	O	O	O	O	O	X	X	X	X	X	X	X	X	X	a	X	O	O	O	O	O	O	O	O	O	O	O	O	O	O	O	O	O	/	7		17	17
2012-05-23	AB inX, DAPT wash-out @ 12.5hpf	1R	O	O	O	O	O	O	O	X	X	X	X	X	X	X	X	X	A	O	O	O	O	O	O	O	O	O	O	O	O	O	O	O	O	O	O	/	7		15	15
2012-05-23	AB inX, DAPT wash-out @ 12.5hpf	2L	O	O	O	O	O	O	X	O	X	X	X	X	X	X	X	X	a	O	O	O	O	O	O	O	O	O	O	O	O	O	O	O	O	O	?		6		16	16
2012-05-23	AB inX, DAPT wash-out @ 12.5hpf	2R	O	O	O	O	O	O	X	X	O	O	O	X	X	X	X	X	A	O	O	O	O	O	O	O	O	O	O	O	O	O	O	O	O	O	?		6		15	15
2012-05-23	AB inX, DAPT wash-out @ 12.5hpf	3L	O	O	O	O	O	X	O	X	X	X	X	X	X	X	X	X	a	X	O	X	X	X	X	X	O	O	O	O	O	O	O	O	O	?			5		17	23
2012-05-23	AB inX, DAPT wash-out @ 12.5hpf	3R	X	O	O	O	O	O	O	O	X	X	X	X	X	X	X	X	a	X	O	O	O	O	O	O	O	O	O	O	O	O	O	O	O	?			8		17	17
2012-05-23	AB inX, DAPT wash-out @ 12.5hpf	4L	O	O	O	O	O	O	X	X	X	X	X	X	X	X	X	X	a	O	O	O	O	O	O	O	O	O	O	O	O	O	O	O	O	O	/		6		16	16
2012-05-23	AB inX, DAPT wash-out @ 12.5hpf	4R	O	O	O	O	O	X	X	X	X	X	X	X	X	X	X	X	A	O	O	O	O	O	O	O	O	O	O	O	O	O	O	O	O	O	/		5		15	15
2012-05-23	AB inX, DAPT wash-out @ 12.5hpf	5L	O	O	O	O	O	X	X	X	X	X	X	X	X	X	X	X	a	O	O	O	O	O	O	O	O	O	O	O	O	O	O	O	O	O	O	/	5		16	16
2012-05-23	AB inX, DAPT wash-out @ 12.5hpf	5R	O	O	O	O	O	O	O	X	X	X	X	O	X	X	X	X	A	O	O	O	O	O	O	O	O	O	O	O	O	O	O	O	O	?			7		10	15
2012-05-23	AB inX, DAPT wash-out @ 12.5hpf	6L	O	O	O	O	O	O	X	X	X	X	X	X	X	X	X	X	a	X	O	O	O	O	O	O	O	O	O	O	O	O	O	O	O	O	O	/	6		17	17
2012-05-23	AB inX, DAPT wash-out @ 12.5hpf	6R	O	O	X	O	O	O	X	X	X	X	X	X	X	X	X	X	a	X	X	O	O	O	O	O	O	O	O	O	O	O	O	O	O	/			2		18	18
2012-05-23	AB inX, DAPT wash-out @ 12.5hpf	7L	O	O	O	O	O	O	X	X	X	X	X	X	X	X	X	X	a	O	O	O	O	O	O	O	O	O	O	O	O	O	O	O	O	?			6		16	16
2012-05-23	AB inX, DAPT wash-out @ 12.5hpf	7R	O	O	O	O	O	X	O	O	X	X	X	O	X	X	X	X	a	X	O	O	O	O	O	O	O	O	O	O	O	O	O	O	O	?			5		10	17
2012-05-23	AB inX, DAPT wash-out @ 12.5hpf	8L	O	O	O	O	X	X	X	X	X	X	X	X	X	X	X	X	a	O	O	O	O	O	O	O	O	O	O	O	O	O	O	O	O	/			4		16	16
2012-05-23	AB inX, DAPT wash-out @ 12.5hpf	8R	O	O	O	O	O	O	X	X	X	X	X	X	X	X	X	X	a	O	O	O	O	O	O	O	O	O	O	O	O	O	O	O	O	?			6		16	16
2012-05-23	AB inX, DAPT wash-out @ 12.5hpf	9L	O	O	O	O	O	X	X	X	X	X	X	X	X	X	X	X	a	O	X	X	X	X	O	O	O	O	O	O	O	O	O	O	?				5		16	21
2012-05-23	AB inX, DAPT wash-out @ 12.5hpf	9R	O	O	O	O	O	X	O	X	X	X	X	X	X	X	X	X	a	O	X	O	X	O	O	O	O	O	O	O	O	O	O	O	?				5		16	20
2012-05-23	AB inX, DAPT wash-out @ 12.5hpf	10L	O	O	O	O	O	O	O	X	X	X	X	X	X	X	X	X	a	X	X	O	O	O	O	O	O	O	O	O	O	O	O	O	O	O	/		7		18	18
2012-05-23	AB inX, DAPT wash-out @ 12.5hpf	10R	O	O	X	O	O	O	O	X	X	X	X	X	X	X	X	X	a	X	O	X	X	O	O	O	O	O	O	O	O	O	O	O	O	O	/		2		17	20
2012-05-23	AB inX, DAPT wash-out @ 12.5hpf	11L	O	O	O	O	O	O	X	X	X	X	X	X	X	X	X	a	X	O	O	O	O	O	O	O	O	O	O	O	O	O	O	O	O	O	/		6		16	16
2012-05-23	AB inX, DAPT wash-out @ 12.5hpf	11R	O	O	O	X	O	O	O	X	X	X	X	X	X	X	X	X	A	O	O	O	O	O	O	O	O	O	O	O	O	O	O	O	O	O	O	/	3		15	15
2012-05-23	AB inX, DAPT wash-out @ 12.5hpf	12L	O	O	O	O	X	X	X	X	X	X	X	X	X	X	X	O	A	O	O	O	O	O	O	O	O	O	O	O	O	O	O	O	O	?			4		14	14
2012-05-23	AB inX, DAPT wash-out @ 12.5hpf	12R	O	O	O	O	O	O	O	X	X	X	X	O	O	O	X	X	a	O	O	O	O	O	O	O	O	O	O	O	O	O	O	O	O	O	?		7		10	16
2012-05-23	AB inX, DAPT wash-out @ 12.5hpf	13L	X	O	O	O	O	O	X	O	X	X	X	X	X	X	X	X	a	O	O	O	O	O	O	O	O	O	O	O	O	O	O	O	O	O	/		6		16	16
2012-05-23	AB inX, DAPT wash-out @ 12.5hpf	13R	O	O	O	X	O	X	X	X	X	X	X	X	X	X	X	O	A	O	O	O	O	O	O	O	O	O	O	O	O	O	O	O	O	O	/		3		14	14
2012-05-23	AB inX, DAPT wash-out @ 12.5hpf	14L	O	O	X	O	O	X	O	O	X	X	X	X	X	X	X	X	a	O	O	O	O	O	O	O	O	O	O	O	O	O	O	O	O	O	/		2		16	16
2012-05-23	AB inX, DAPT wash-out @ 12.5hpf	28	O	O	O	O	O	O	X	X	X	X	X	X	X	X	X	X	a	O	O	O	O	O	O	O	O	O	O	O	O	O	O	O	O	O	/		6		16	16
			0	1	2	3	4	5	6	7	8	9	10	11	12	13	14	15	16	17	18	19	20	21	22	23	24	25	26	27	28	29	30	31	32	33	34
			92.8571	100	89.2857	92.8571	92.8571	64.2857	42.8571	17.8571	3.57143	3.57143	3.57143	10.7143	3.57143	3.57143	0	7.14286	25	71.4286	85.7143	89.2857	85.7143	92.8571	96.4286	96.4286	100	100	100	100	100	100	100	100	92.8571	65.3846	29.4118		6	Median ALD	16	16	Median
			0	-100	150	-50	0	400	300	350	200	0	0	-100	100	0	50	-100	-250	-650	-200	-50	50	-100	-50	0	-50	0	0	0	0	0	0	0	100	384.615	503.62		5.25	Mean ALD	15.3929	16.6786	Mean
		L	92.8571	100	92.8571	100	85.7143	57.1429	28.5714	21.4286	0	0	0	0	0	0	0	7.14286	7.14286	71.4286	85.7143	85.7143	85.7143	85.7143	92.8571	92.8571	100	100	100	100	100	100	100				60		1.64711	STD	2.13158	2.09149	STD
																																										1.28571	PLD-FRS

## Sheet: tw=9ss
ISH Date	Sample	ID	0	1	2	3	4	5	6	7	8	9	10	11	12	13	14	15	16	17	18	19	20	21	22	23	24	25	26	27	28	29	30	31	32	33	34	30	=ALD fix		FRS	PLD
	*Fix: 831; AB inX, DAPT50 Wash-out @ 14hpf
2012-05-23	AB inX, DAPT wash-out @ 14hpf	1L	O	O	O	O	O	X	O	O	X	X	X	X	X	X	X	X	X	a	X	X	X	O	O	O	O	O	O	O	O	O	O	O	O	O	O	/	5		20	20
2012-05-23	AB inX, DAPT wash-out @ 14hpf	1R	O	O	X	X	O	O	O	X	X	X	X	X	X	X	X	X	X	a	X	X	O	O	O	O	O	O	O	O	O	O	O	O	O	O	O	/	2		19	19
2012-05-23	AB inX, DAPT wash-out @ 14hpf	2L	O	O	O	O	O	O	O	O	X	X	X	X	X	X	X	X	a	X	O	X	O	O	O	O	O	O	O	O	O	O	O	O	O	/			8		17	19
2012-05-23	AB inX, DAPT wash-out @ 14hpf	2R	O	O	O	O	O	X	X	X	O	X	X	X	X	X	X	X	a	X	O	O	O	O	O	O	O	O	O	O	O	O	O	O	O	/			5		17	17
2012-05-23	AB inX, DAPT wash-out @ 14hpf	3L	O	O	O	O	O	O	O	X	X	X	X	X	X	X	X	X	a	O	X	O	O	O	O	O	O	O	O	O	O	O	O	O	O	O	/		7		16	18
2012-05-23	AB inX, DAPT wash-out @ 14hpf	3R	O	O	O	O	O	O	O	O	X	X	X	X	X	X	X	X	a	X	X	O	O	O	O	O	O	O	O	O	O	O	O	O	O	O	/		8		18	18
2012-05-23	AB inX, DAPT wash-out @ 14hpf	4L	O	O	O	O	O	O	X	X	X	X	X	X	X	X	X	X	X	a	O	X	O	O	O	O	O	O	O	O	O	O	O	O	O	O	?		6		17	19
2012-05-23	AB inX, DAPT wash-out @ 14hpf	4R	O	O	O	O	O	X	X	O	X	X	X	X	X	X	X	X	X	a	X	O	O	O	O	O	O	O	O	O	O	O	O	O	O	O	O	/	5		18	18
2012-05-23	AB inX, DAPT wash-out @ 14hpf	5L	O	O	O	O	O	X	X	X	X	X	X	X	X	X	X	a	X	X	X	X	O	O	O	O	O	O	O	O	O	O	O	O	O	O	/		5		19	19
2012-05-23	AB inX, DAPT wash-out @ 14hpf	5R	O	O	O	O	O	O	X	X	X	X	X	X	X	X	X	X	a	X	X	X	O	O	O	O	O	O	O	O	O	O	O	O	O	O	O	/	6		19	19
2012-05-23	AB inX, DAPT wash-out @ 14hpf	6L	O	O	O	O	O	O	X	X	X	X	X	X	X	X	X	X	a	X	O	X	O	O	O	O	O	O	O	O	O	O	O	O	?				6		17	19
2012-05-23	AB inX, DAPT wash-out @ 14hpf	6R	O	O	O	O	O	O	X	X	X	X	X	X	X	X	X	X	a	X	X	O	O	O	O	O	O	O	O	O	O	O	O	O	O	/			6		18	18
2012-05-23	AB inX, DAPT wash-out @ 14hpf	7L	X	X	O	X	O	O	X	X	X	X	X	X	X	X	X	X	a	O	X	O	O	O	O	O	O	O	O	O	O	O	O	O	O	/			3		16	18
2012-05-23	AB inX, DAPT wash-out @ 14hpf	7R	O	O	O	O	X	X	X	X	X	X	X	X	X	X	X	X	a	X	O	O	O	O	O	O	O	O	O	O	O	O	O	O	O	O	/		4		17	17
2012-05-23	AB inX, DAPT wash-out @ 14hpf	8L	O	O	X	O	O	O	X	X	X	X	X	X	X	X	X	X	a	X	X	X	X	O	X	X	O	O	O	O	O	O	O	O	O	O	/		2		20	23
2012-05-23	AB inX, DAPT wash-out @ 14hpf	8R	O	O	O	O	O	O	X	X	X	X	X	X	X	X	X	X	a	X	O	O	O	O	O	O	O	O	O	O	O	O	O	O	O	O	O	/	6		17	17
2012-05-23	AB inX, DAPT wash-out @ 14hpf	9L	O	O	O	O	O	X	X	X	X	X	X	X	X	X	X	X	a	X	O	O	X	X	O	O	O	O	O	O	O	O	O	O	O	O	/		5		17	21
2012-05-23	AB inX, DAPT wash-out @ 14hpf	9R	O	O	O	O	O	X	X	X	X	X	X	X	X	X	X	X	a	X	X	X	X	X	X	O	O	O	O	O	O	O	O	O	O	O	O	/	5		22	22
2012-05-23	AB inX, DAPT wash-out @ 14hpf	10L	O	O	O	O	X	X	X	X	X	X	X	X	X	X	X	X	X	a	O	O	X	X	O	O	O	O	O	O	O	O	O	O	?				4		17	21
2012-05-23	AB inX, DAPT wash-out @ 14hpf	10R	O	O	O	O	O	O	O	X	X	X	X	X	X	X	X	X	X	a	X	O	O	X	O	O	O	O	O	O	O	O	O	O	O	?			7		18	21
2012-05-23	AB inX, DAPT wash-out @ 14hpf	11L	O	O	O	O	O	O	X	X	X	X	X	X	X	X	X	X	a	X	O	O	O	X	X	X	O	O	O	O	O	O	O	O	O	O	/		6		17	23
2012-05-23	AB inX, DAPT wash-out @ 14hpf	11R	O	O	O	O	O	O	O	X	X	X	X	X	X	X	X	X	a	X	X	X	X	O	O	O	O	O	O	O	O	O	O	O	O	O	/		7		20	20
2012-05-23	AB inX, DAPT wash-out @ 14hpf	12L	O	O	O	O	O	O	O	X	X	X	X	X	X	X	X	X	X	a	X	O	X	X	O	O	O	O	O	O	O	O	O	O	O	O	O	/	7		18	21
2012-05-23	AB inX, DAPT wash-out @ 14hpf	12R	O	O	O	O	O	O	O	X	X	X	X	X	X	X	X	X	X	a	X	O	O	O	O	O	O	O	O	O	O	O	O	O	O	O	O	/	7		18	18
2012-05-23	AB inX, DAPT wash-out @ 14hpf	13L	O	O	O	O	O	X	X	X	X	X	X	X	X	X	X	X	a	X	X	X	O	O	O	O	O	O	O	O	O	O	O	O	O	O	O	/	5		19	19
2012-05-23	AB inX, DAPT wash-out @ 14hpf	13R	O	O	O	O	O	O	X	X	X	X	X	X	X	X	X	X	X	a	X	X	X	O	O	O	O	O	O	O	O	O	O	O	O	O	O	/	6		20	20
2012-05-23	AB inX, DAPT wash-out @ 14hpf	14L	O	O	O	O	O	X	O	O	X	X	X	X	X	X	X	X	a	X	X	X	O	O	O	O	O	O	O	O	O	O	O	O	O	/			5		19	19
2012-05-23	AB inX, DAPT wash-out @ 14hpf	14R	O	O	O	O	O	X	X	X	X	X	X	X	X	X	X	X	a	X	O	O	X	X	O	O	O	O	O	O	O	O	O	O	O	O	/		5		17	21
2012-05-23	AB inX, DAPT wash-out @ 14hpf	15L	O	O	O	O	O	X	X	X	X	X	X	X	X	X	X	X	A	O	X	O	O	O	O	O	O	O	O	O	O	O	O	O	O	?			5		16	18
2012-05-23	AB inX, DAPT wash-out @ 14hpf	30	O	O	O	O	O	X	X	X	X	X	X	X	X	X	X	X	X	a	X	X	O	O	O	O	O	O	O	O	O	O	O	O	O	O	/		5		19	19
			0	1	2	3	4	5	6	7	8	9	10	11	12	13	14	15	16	17	18	19	20	21	22	23	24	25	26	27	28	29	30	31	32	33	34
			96.6667	96.6667	93.3333	93.3333	93.3333	56.6667	33.3333	16.6667	3.33333	0	0	0	0	0	0	0	3.33333	10	33.3333	53.3333	70	76.6667	90	93.3333	100	100	100	100	100	100	100	100	93.3333	75	47.619		5	Median ALD	18	19	Median PLD
			0	0	50	0	0	550	350	250	200	50	0	0	0	0	0	0	-50	-100	-350	-300	-250	-100	-200	-50	-100	0	0	0	0	0	0	0	100	275	410.714		5.43333	Mean ALD	18.0667	19.3667	Mean PLD
		L	93.3333	93.3333	93.3333	93.3333	93.3333	53.3333	33.3333	20	0	0	0	0	0	0	0	0	6.66667	20	40	46.6667	66.6667	73.3333	86.6667	86.6667	100	100	100	100	100	100	100				53.5556		1.47819	STD	1.43679	1.65015	STD
		R	100	100	93.3333	93.3333	93.3333	60	33.3333	13.3333	6.66667	0	0	0	0	0	0	0	0	0	26.6667	60	73.3333	80	93.3333	100	100	100	100	100	100	100	100				54.2222					1.3	PLD-FRS

## Sheet: tw=12ss
ISH Date	Sample	ID	0	1	2	3	4	5	6	7	8	9	10	11	12	13	14	15	16	17	18	19	20	21	22	23	24	25	26	27	28	29	30	31	32	33	34	30	=ALD fix		FRS	PLD
	*Fix: 833; AB inX, DAPT50 Wash-out @ 15.5hpf
2012-05-23	AB inX, DAPT wash-out @ 15.5hpf	1L	O	O	O	O	O	O	X	X	X	X	X	X	X	X	X	X	a	X	X	X	X	O	O	O	O	O	O	O	O	O	O	O	O	/			6		20	20
2012-05-23	AB inX, DAPT wash-out @ 15.5hpf	1R	O	O	O	O	O	O	O	X	X	X	X	X	X	X	X	X	a	X	X	X	X	O	X	O	O	O	O	O	O	O	O	O	?				7		20	22
2012-05-23	AB inX, DAPT wash-out @ 15.5hpf	2L	O	O	O	O	O	O	X	X	X	X	X	X	X	X	X	X	a	X	X	X	O	X	O	O	O	O	O	O	O	O	O	O	/				6		19	21
2012-05-23	AB inX, DAPT wash-out @ 15.5hpf	2R	O	O	O	O	O	X	X	X	X	X	X	X	X	X	X	X	a	X	X	X	X	X	O	O	O	O	O	O	O	O	O	O	O	/			5		21	21
2012-05-23	AB inX, DAPT wash-out @ 15.5hpf	3L	O	O	O	O	O	O	O	O	X	X	X	X	X	X	X	X	a	X	X	X	X	X	O	O	O	O	O	O	O	O	O	O	O	/			8		21	21
2012-05-23	AB inX, DAPT wash-out @ 15.5hpf	3R	O	O	O	O	O	O	X	O	X	X	X	X	X	X	X	X	a	X	O	X	O	O	O	O	O	O	O	O	O	O	O	O	O	/			6		17	19
2012-05-23	AB inX, DAPT wash-out @ 15.5hpf	4L	O	O	O	X	O	O	O	X	X	X	X	X	X	X	X	X	X	a	X	X	X	O	O	X	X	X	O	O	O	O	O	O	O	O	O	/	3		20	25
2012-05-23	AB inX, DAPT wash-out @ 15.5hpf	4R	O	O	O	O	X	O	O	X	O	X	X	X	X	X	X	X	X	a	X	X	X	X	X	X	X	O	O	O	O	O	O	O	O	O	?		4		24	24
2012-05-23	AB inX, DAPT wash-out @ 15.5hpf	5L	O	O	O	O	O	O	X	X	X	X	X	X	X	X	X	X	a	X	X	X	O	X	X	O	O	O	O	O	O	O	O	O	O	O	/		6		19	22
2012-05-23	AB inX, DAPT wash-out @ 15.5hpf	5R	O	O	O	O	O	O	O	O	X	X	X	X	X	X	X	X	X	a	X	X	X	X	O	O	O	O	O	O	O	O	O	O	O	O	/		8		21	21
2012-05-23	AB inX, DAPT wash-out @ 15.5hpf	6L	O	O	O	O	O	X	X	X	X	X	X	X	X	X	X	X	X	a	X	X	X	X	O	O	O	O	O	O	O	O	O	O	O	O	O	/	5		21	21
2012-05-23	AB inX, DAPT wash-out @ 15.5hpf	6R	O	O	O	O	O	O	X	X	X	X	X	X	X	X	X	X	X	a	X	X	X	X	X	O	O	O	O	O	O	O	O	O	O	O	O	/	6		22	22
2012-05-23	AB inX, DAPT wash-out @ 15.5hpf	7L	O	O	O	O	O	X	X	X	X	X	X	X	X	X	X	X	a	X	O	X	O	O	O	O	O	O	O	O	O	O	O	O	O	O	/		5		17	19
2012-05-23	AB inX, DAPT wash-out @ 15.5hpf	7R	O	O	O	O	O	O	O	X	X	X	X	X	X	X	X	X	X	a	X	X	O	X	O	O	O	O	O	O	O	O	O	O	O	O	O	/	7		19	21
2012-05-23	AB inX, DAPT wash-out @ 15.5hpf	8L	O	O	X	O	O	O	X	X	X	X	X	X	X	X	X	X	X	a	X	X	X	X	X	O	O	O	O	O	O	O	O	O	O	O	O	/	2		22	22
2012-05-23	AB inX, DAPT wash-out @ 15.5hpf	8R	O	O	O	O	O	O	X	X	X	X	X	X	X	X	X	X	X	a	X	X	X	O	X	X	O	X	O	O	O	O	O	O	O	O	O	/	6		20	25
2012-05-23	AB inX, DAPT wash-out @ 15.5hpf	9L	O	O	O	O	X	O	O	X	X	X	X	X	X	X	X	X	a	X	X	X	X	X	X	O	X	X	O	O	O	O	O	O	O	?			4		22	25
2012-05-23	AB inX, DAPT wash-out @ 15.5hpf	9R	O	O	O	O	O	O	O	X	X	X	X	X	X	X	X	X	a	O	X	X	X	O	O	O	O	O	O	O	O	O	O	O	O	O	O	/	7		16	20
2012-05-23	AB inX, DAPT wash-out @ 15.5hpf	10L	O	O	O	O	O	O	X	X	X	X	X	X	X	X	X	X	a	O	X	X	X	O	O	X	O	O	O	O	O	O	O	O	O	O	/		6		16	23
2012-05-23	AB inX, DAPT wash-out @ 15.5hpf	10R	O	O	O	O	O	O	X	X	X	X	X	X	X	X	X	X	a	X	X	X	X	O	O	O	O	O	O	O	O	O	O	O	O	O	/		6		20	20
2012-05-23	AB inX, DAPT wash-out @ 15.5hpf	11L	O	O	O	O	O	O	X	X	X	X	X	X	X	X	X	X	X	a	O	O	X	O	O	O	X	X	O	O	O	O	O	O	O	O	/		6		17	25
2012-05-23	AB inX, DAPT wash-out @ 15.5hpf	11R	O	O	O	O	O	O	X	X	X	X	X	X	X	X	X	X	X	a	X	X	X	O	O	X	O	O	O	O	O	O	O	O	O	O	/		6		20	23
2012-05-23	AB inX, DAPT wash-out @ 15.5hpf	12L	O	O	O	O	O	O	O	X	X	X	X	X	X	X	X	X	X	a	X	X	O	O	X	X	O	O	O	O	O	O	O	O	O	O	/		7		19	23
2012-05-23	AB inX, DAPT wash-out @ 15.5hpf	12R	O	O	O	O	O	O	X	O	X	X	X	X	X	X	X	X	X	a	X	X	X	X	X	O	O	O	O	O	O	O	O	O	O	O	?		6		22	22
2012-05-23	AB inX, DAPT wash-out @ 15.5hpf	13L	O	O	O	O	X	O	O	X	X	X	X	X	X	X	X	X	a	X	X	X	X	O	O	O	O	O	O	O	O	O	O	O	O	O	?		4		20	20
2012-05-23	AB inX, DAPT wash-out @ 15.5hpf	26	O	O	O	O	O	X	X	X	X	X	X	X	X	X	X	X	a	X	X	X	X	X	X	X	O	O	O	O	O	O	O	O	O	O	?		5		23	23
			0	1	2	3	4	5	6	7	8	9	10	11	12	13	14	15	16	17	18	19	20	21	22	23	24	25	26	27	28	29	30	31	32	33	34
			100	100	96.1538	96.1538	88.4615	84.6154	38.4615	15.3846	3.84615	0	0	0	0	0	0	0	0	7.69231	11.5385	3.84615	23.0769	50	61.5385	73.0769	84.6154	84.6154	100	100	100	100	100	100	92.3077	79.1667	36.8421		6	Median ALD	20	22	Median
			0	0	50	0	100	50	600	300	150	50	0	0	0	0	0	0	0	-100	-50	100	-250	-350	-150	-150	-150	0	-200	0	0	0	0	0	100	170.833	550.219		5.65385	Mean ALD	19.9231	21.9231	Mean
		L	100	100	92.3077	92.3077	84.6154	84.6154	38.4615	7.69231	0	0	0	0	0	0	0	0	0	7.69231	15.3846	7.69231	30.7692	53.8462	69.2308	76.9231	76.9231	76.9231	100	100	100	100	100				47.1795		1.41258	STD	2.07698	1.83135	STD
		R	100	100	100	100	92.3077	84.6154	38.4615	23.0769	7.69231	0	0	0	0	0	0	0	0	7.69231	7.69231	0	15.3846	46.1538	53.8462	69.2308	92.3077	92.3077	100	100	100	100	100				47.6923
